# Supplementary material for: Evaluation of Whole-Tumor Texture Analysis Based on MRI Diffusion Kurtosis and Biparametric VI-RADS Model for Staging and Grading Bladder Cancer
Source: MDPI journal article supplement (doi:10.3390/bioengineering10070745), 2023-06-21
Supplement: s1 [file s1]

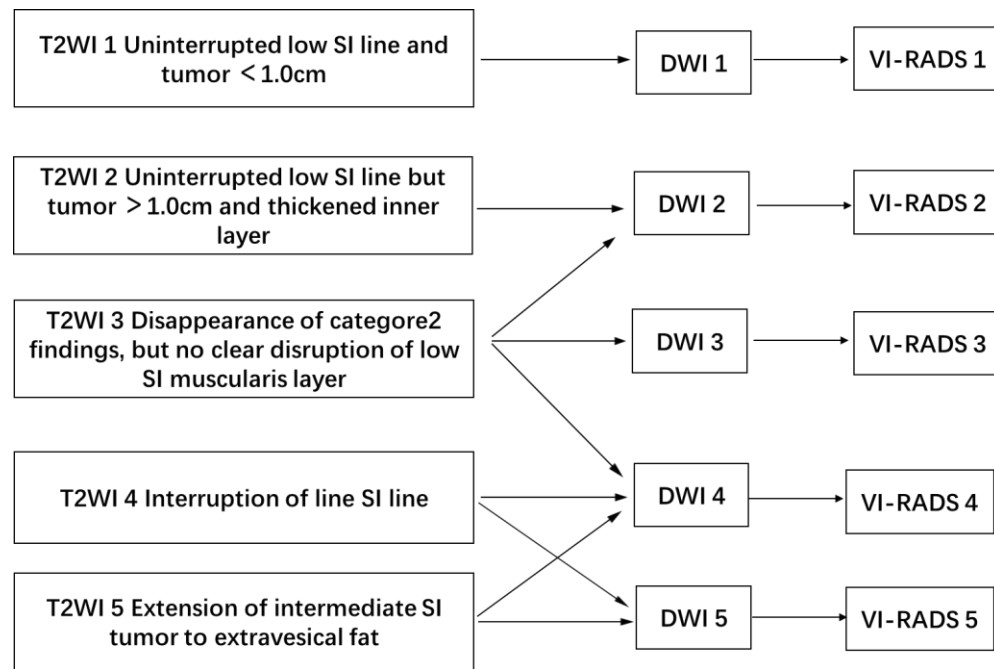

Figure S1: Five-point VI-RADS scoring system based on T2WI and DWI.

Table S1: Measurement consistency of two observers of DKI histogram parameter.

|               | MD    |                | MK    |                |
|---------------|-------|----------------|-------|----------------|
|               | ICC   | 95%CI          | ICC   | 95%CI          |
| mean          | 0.980 | 0.957 to 0.990 | 0.992 | 0.992 to 0.998 |
| 5th           | 0.997 | 0.993 to 0.999 | 0.984 | 0.967 to 0.993 |
| 25th          | 0.997 | 0.993 to 0.998 | 0.984 | 0.966 to 0.992 |
| 50th          | 0.993 | 0.985 to 0.997 | 0.997 | 0.993 to 0.998 |
| 75th          | 0.970 | 0.938 to 0.986 | 0.998 | 0.996 to 0.999 |
| 90th          | 0.910 | 0.811 to 0.957 | 0.993 | 0.986 to 0.997 |
| inhomogeneity | 0.961 | 0.919 to 0.981 | 0.992 | 0.984 to 0.996 |
| skewness      | 0.928 | 0.849 to 0.966 | 0.958 | 0.912 to 0.980 |
| kurtosis      | 0.900 | 0.790 to 0.953 | 0.922 | 0.834 to 0.963 |
| entropy       | 0.956 | 0.907 to 0.979 | 0.915 | 0.818 to 0.959 |
